# Supplementary material for: Self-Assembly of Gold Nanoparticles into Ring-Like Hierarchical Superstructures with Tunable Interparticle Distance
Source: Royal Society of Chemistry journal article supplement (doi:10.1039/d4sm00836g), 2024-01-01
Supplement: d4sm00836g1.pdf [file d4sm00836g1.pdf]

**Supporting Information for the manuscript**

**Self-Assembly of Gold Nanoparticles into Ring-Like Hierarchical  
Superstructures with Tunable Interparticle Distance**

*Xuan Yue,<sup>1</sup> Feibo Li,<sup>1</sup> Xiying Fu,<sup>1</sup> Yanming Wang,<sup>\*1</sup> Nan Yan<sup>\*2</sup>*

<sup>1</sup>College of Materials Science and Engineering, Technology Innovation Center of Modified Plastics of Hebei Province, Hebei University of Engineering, Handan 056038, China

<sup>2</sup>College of Chemistry, Changchun Normal University, Changchun 130032, China

\*Corresponding authors

\*E-mail: yanmingwang@hebeu.edu.cn; yannan@ccsfu.edu.cn

**SUPPORTING FIGURES:**

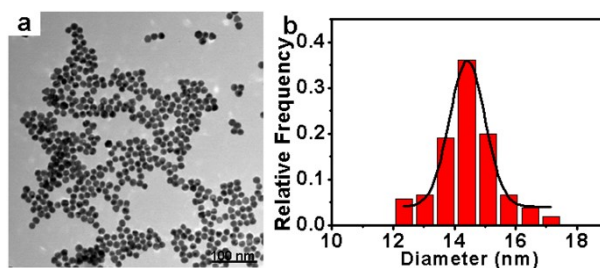

**Figure S1.** (a) TEM image of the synthesized AuNPs with the diameter of  $15.2 \pm 1.2$  nm. The average diameter of AuNPs is obtained from the statistics of 100 AuNPs by TEM analysis software. (b) The diameter distribution histogram of AuNPs.

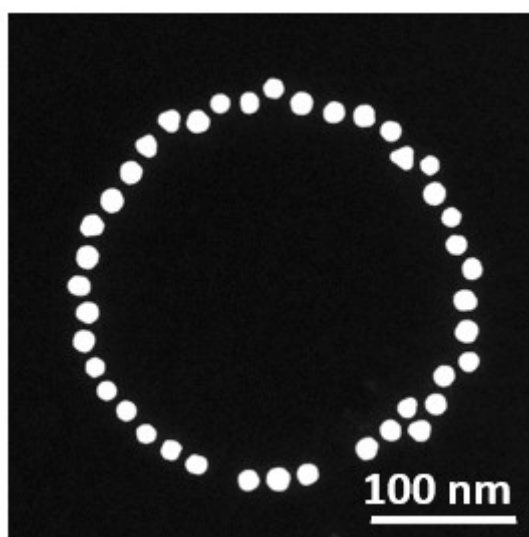

**Figure S2.** Corresponding STEM image of Au on the ring-like superstructures.

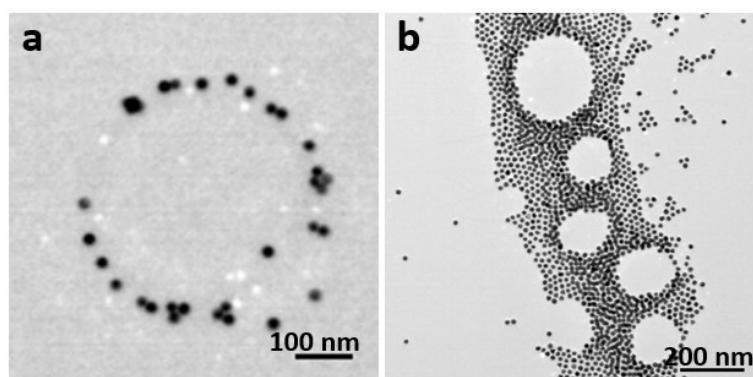

**Figure S3.** (a) TEM image of the ring-like superstructure formed by AuNPs@PS<sub>5k</sub> building blocks at very low concentration. (b) TEM image of honeycomb

superstructures formed by AuNPs@PS<sub>5k</sub> building blocks at significantly higher concentration.

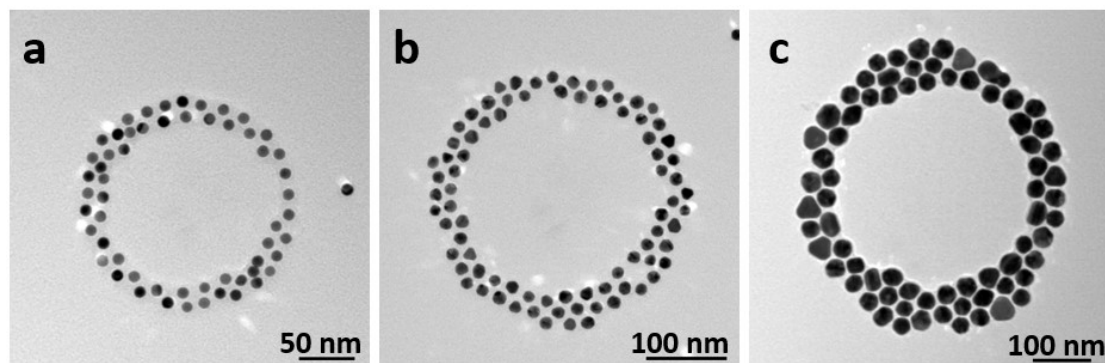

**Figure S4.** TEM images of the prepared ring-like superstructures self-assembled from AuNPs@PS building blocks with different diameter of AuNPs. The diameters of AuNPs are (a) 10 nm, (b) 15 nm, and (c) 40 nm, respectively.

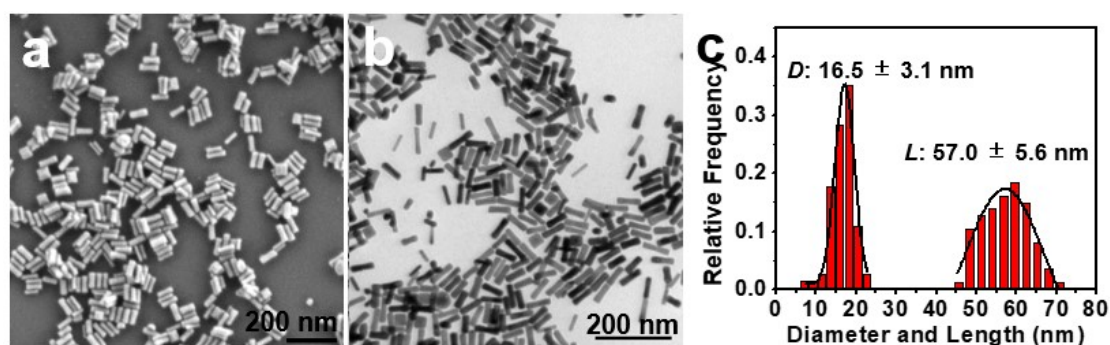

**Figure S5.** SEM (a) and TEM (b) images of the synthesized PS-tethered AuNRs, respectively. (c) The diameter and length distribution histograms of AuNRs are obtained from the statistics of 100 AuNRs by TEM analysis software.

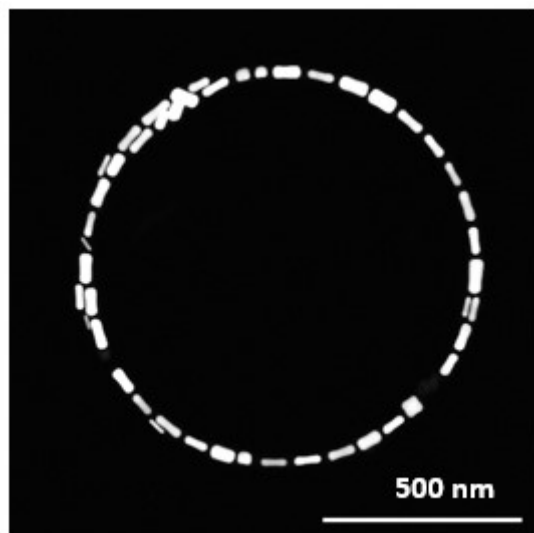

**Figure S6.** STEM image of the ring-like superstructures self-assembled from AuNRs@PS<sub>12k</sub> building blocks.

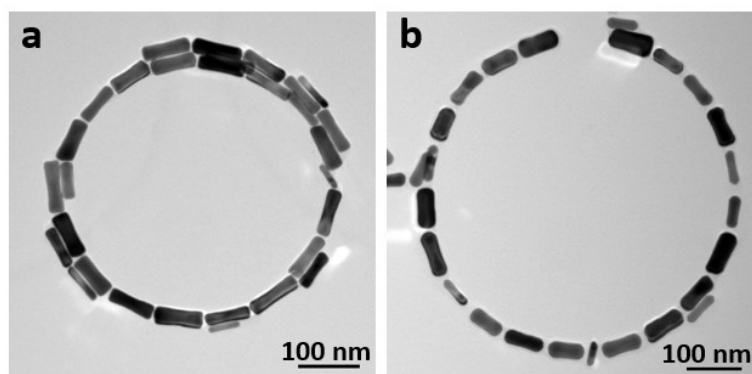

**Figure S7.** TEM images of the ring-like superstructures self-assembled from the (a) AuNRs@PS<sub>5k</sub>, (b) AuNRs@PS<sub>12k</sub> building blocks, respectively.

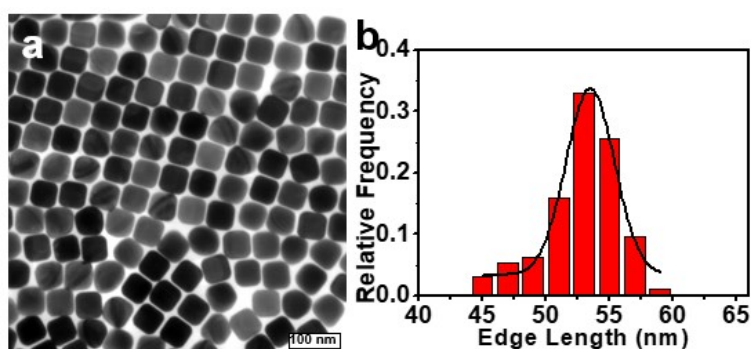

**Figure S8.** (a) TEM images of the synthesized PS-tethered AuNCs. (b) The diameter and length distribution histograms of AuNCs are obtained from the statistics of 100

AuNCs by TEM analysis software.
